# Supplementary material for: Association between Temperature and Influenza Activity across Different Regions of China during 2010–2017
Source: MDPI journal article supplement (doi:10.3390/v15030594), 2023-02-21
Supplement: s1 [file s1]

# Association between temperature and influenza activity across different regions of China during 2010-2017

**Table S1.** Summary of the total number of cases of ILI, Flu A, and Flu B in northern, central, and southern China

|                | ILI      | Flu A  | Flu B  |
|----------------|----------|--------|--------|
| Total          | 30995833 | 286916 | 177881 |
| Northern China | 11271495 | 100524 | 60163  |
| Central China  | 11676863 | 122585 | 76559  |
| Southern China | 7454224  | 59586  | 38920  |

**Table S2.** P-value of Spearman's rank correlation analysis between the rate of ILI/Flu A/Flu B and meteorological factors

|                | Temperature | RH     | Wind speed | PRS    | Flu A  | Flu B  | ILI |
|----------------|-------------|--------|------------|--------|--------|--------|-----|
| Northern China |             |        |            |        |        |        |     |
| Temperature    |             |        |            |        |        |        |     |
| RH             | 0.0000      |        |            |        |        |        |     |
| Wind speed     | 0.1435      | 0.0000 |            |        |        |        |     |
| AP             | 0.0000      | 0.0000 | 0.0000     |        |        |        |     |
| Flu A          | 0.0000      | 0.0000 | 0.0000     | 0.0000 |        |        |     |
| Flu B          | 0.0000      | 0.0000 | 0.0000     | 0.0000 | 0.0000 |        |     |
| ILI            | 0.0000      | 0.0000 | 0.6163     | 0.0000 | 0.0000 | 0.0000 |     |
| Central China  |             |        |            |        |        |        |     |
| Temperature    |             |        |            |        |        |        |     |
| RH             | 0.0000      |        |            |        |        |        |     |
| Wind speed     | 0.8095      | 0.0000 |            |        |        |        |     |
| AP             | 0.0000      | 0.0000 | 0.0000     |        |        |        |     |
| Flu A          | 0.0000      | 0.0423 | 0.0087     | 0.0000 |        |        |     |
| Flu B          | 0.0000      | 0.0000 | 0.0000     | 0.0000 | 0.6865 |        |     |
| ILI            | 0.0000      | 0.0004 | 0.0033     | 0.0000 | 0.0000 | 0.0000 |     |
| Southern China |             |        |            |        |        |        |     |
| Temperature    |             |        |            |        |        |        |     |
| RH             | 0.0000      |        |            |        |        |        |     |
| Wind speed     | 0.0000      | 0.0000 |            |        |        |        |     |
| AP             | 0.0000      | 0.0000 | 0.0000     |        |        |        |     |
| Flu A          | 0.0000      | 0.0000 | 0.2126     | 0.0000 |        |        |     |
| Flu B          | 0.0000      | 0.8940 | 0.0009     | 0.0000 | 0.5217 |        |     |
| ILI            | 0.0000      | 0.0000 | 0.6383     | 0.0000 | 0.0000 | 0.0000 |     |

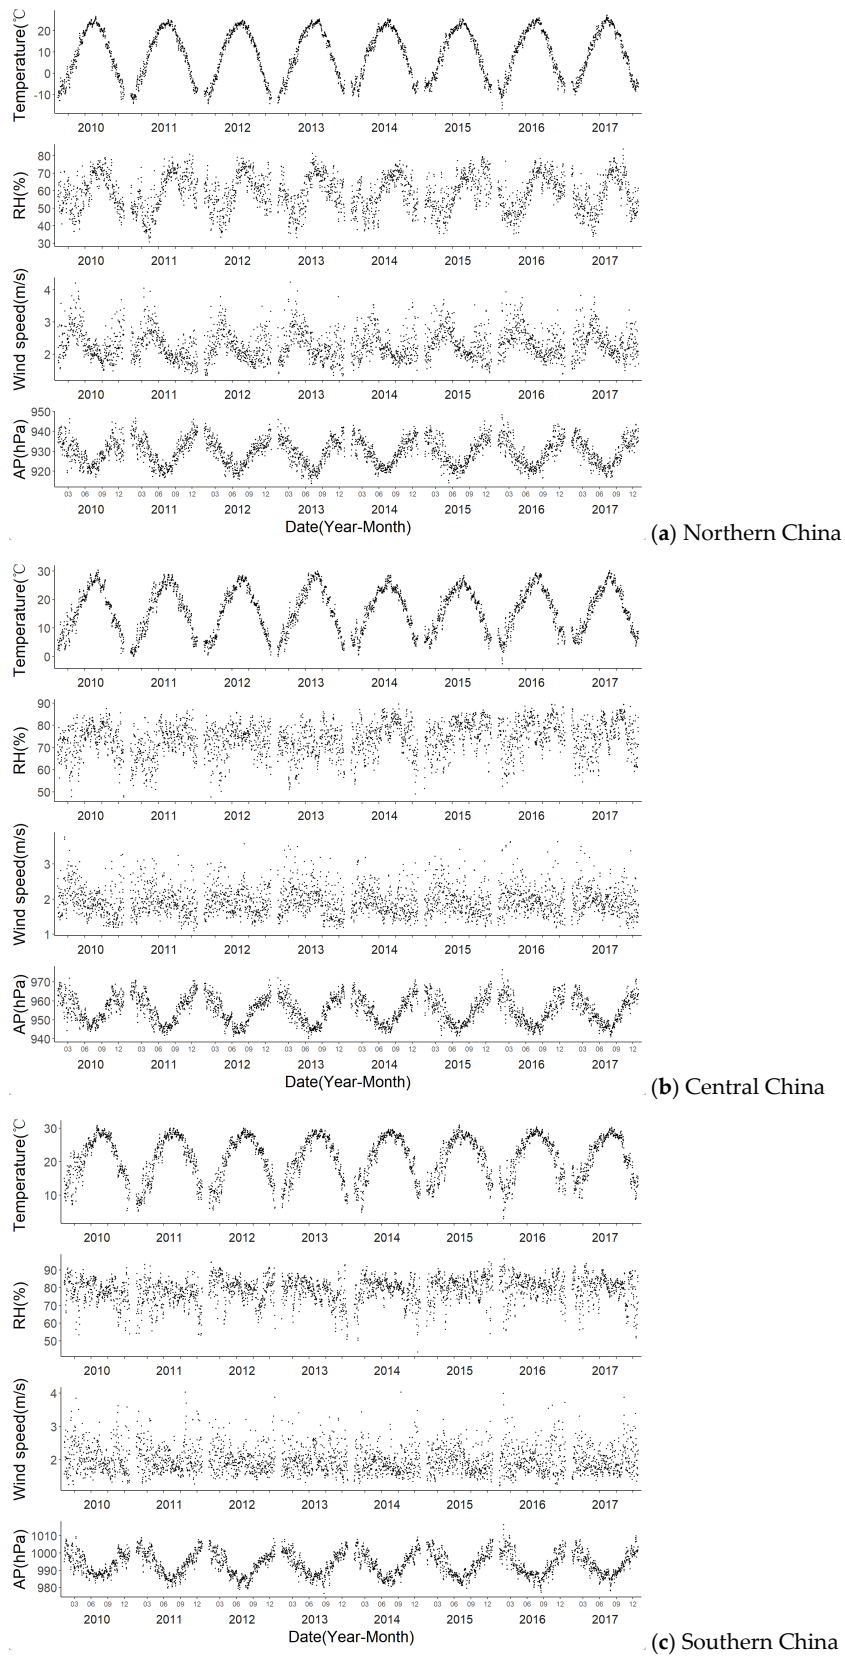

**Figure S1.** Meteorological trends in three regions, 2010–2017. (a): Northern China; (b): Central China; (c): Southern China. Abbreviations: RH, relative risk; AP, air pressure.

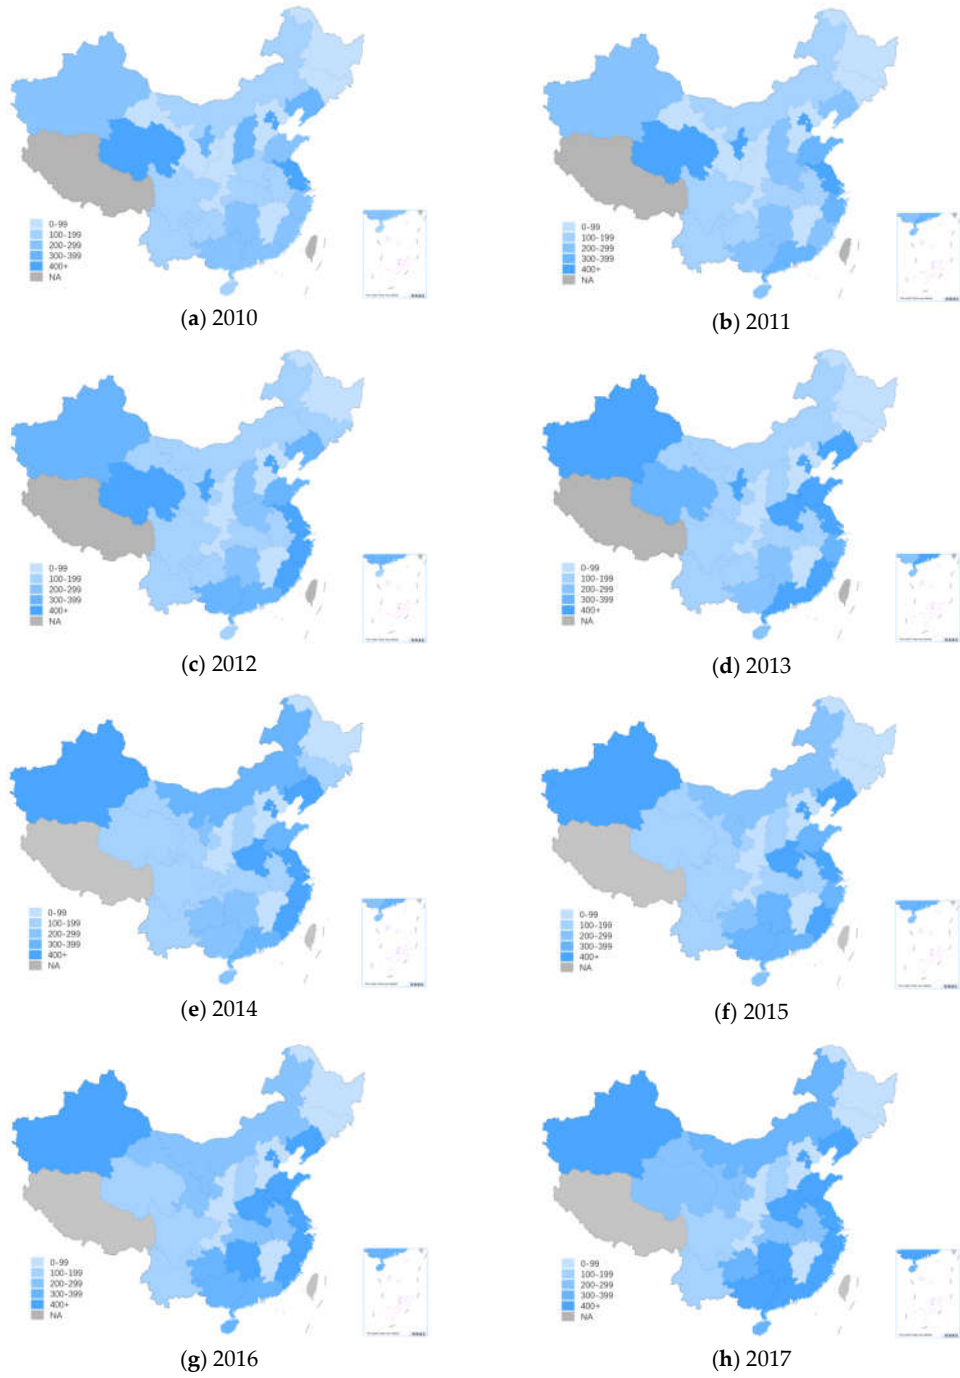

**Figure S2.** Heat map of the number of ILI per 100,000 people by province in China, 2010-2017 ((a)-(h) for 2010-2017, respectively).

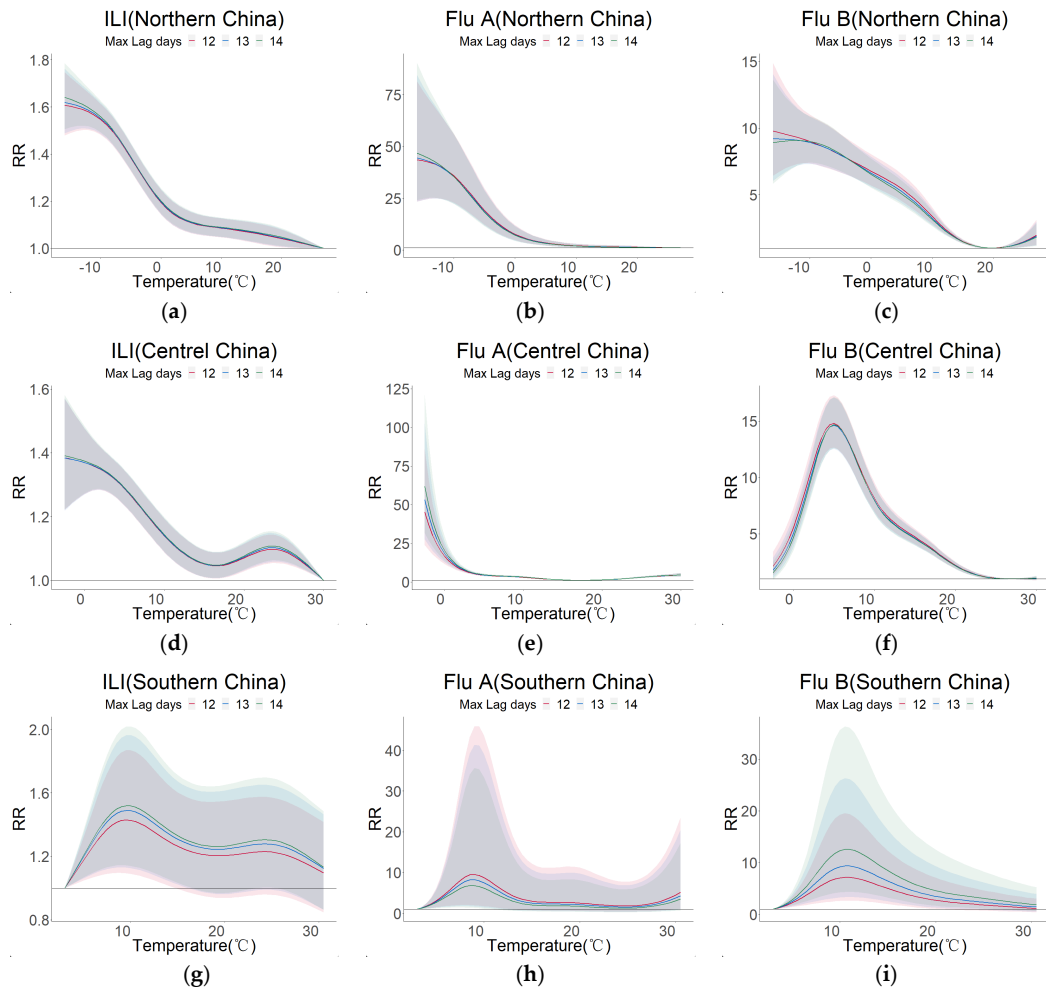

**Figure S3.** Sensitivity analysis when altering the maximum lag time for 12, 13, and 14 days in the model. The red color donates the maximum lag is 12; The blue color donates the maximum lag is 13; The green color donates the maximum lag is 14. (a): ILI in northern China; (b): Flu A in northern China; (c): Flu B in northern China; (d): ILI in central China; (e): Flu A in central China; (f): Flu B in central China; (g): ILI in southern China; (h): Flu A in southern China; (i): Flu B in southern China. The shaded area represents the 95% confidence interval. Abbreviations: ILI, influenza-like illness; Flu A, influenza A; Flu B, influenza B; RR, relative risk.

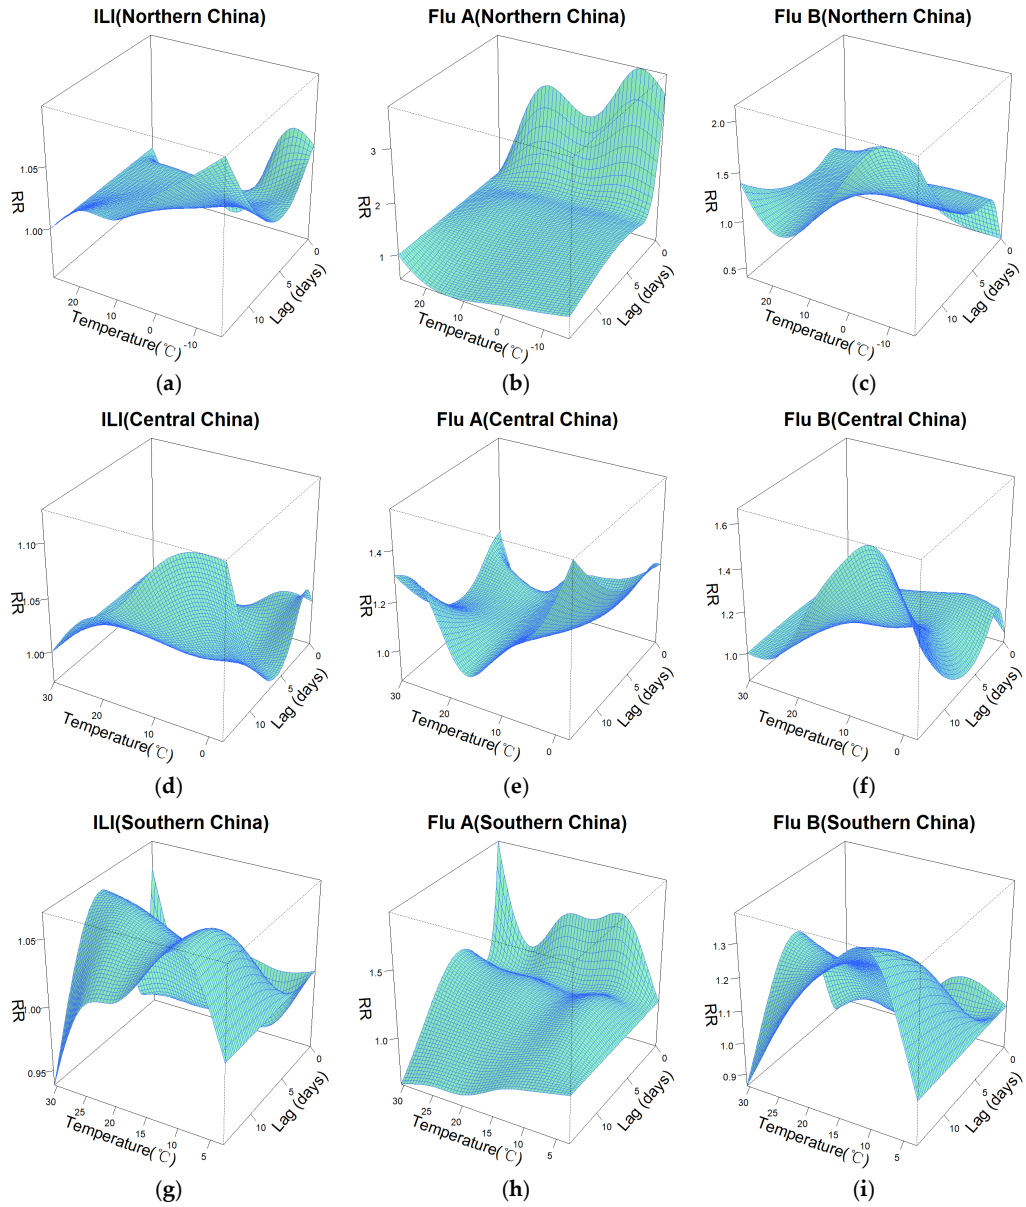

**Figure S4.** 3D plots of the relationship between ILI, Flu A, and Flu B and temperature in different regions. (a): ILI in northern China; (b): Flu A in northern China; (c): Flu B in northern China; (d): ILI in central China; (e): Flu A in central China; (f): Flu B in central China; (g): ILI in southern China; (h): Flu A in southern China; (i): Flu B in southern China. Abbreviations: ILI, influenza-like illness; Flu A, influenza A; Flu B, influenza B; RR, relative risk.

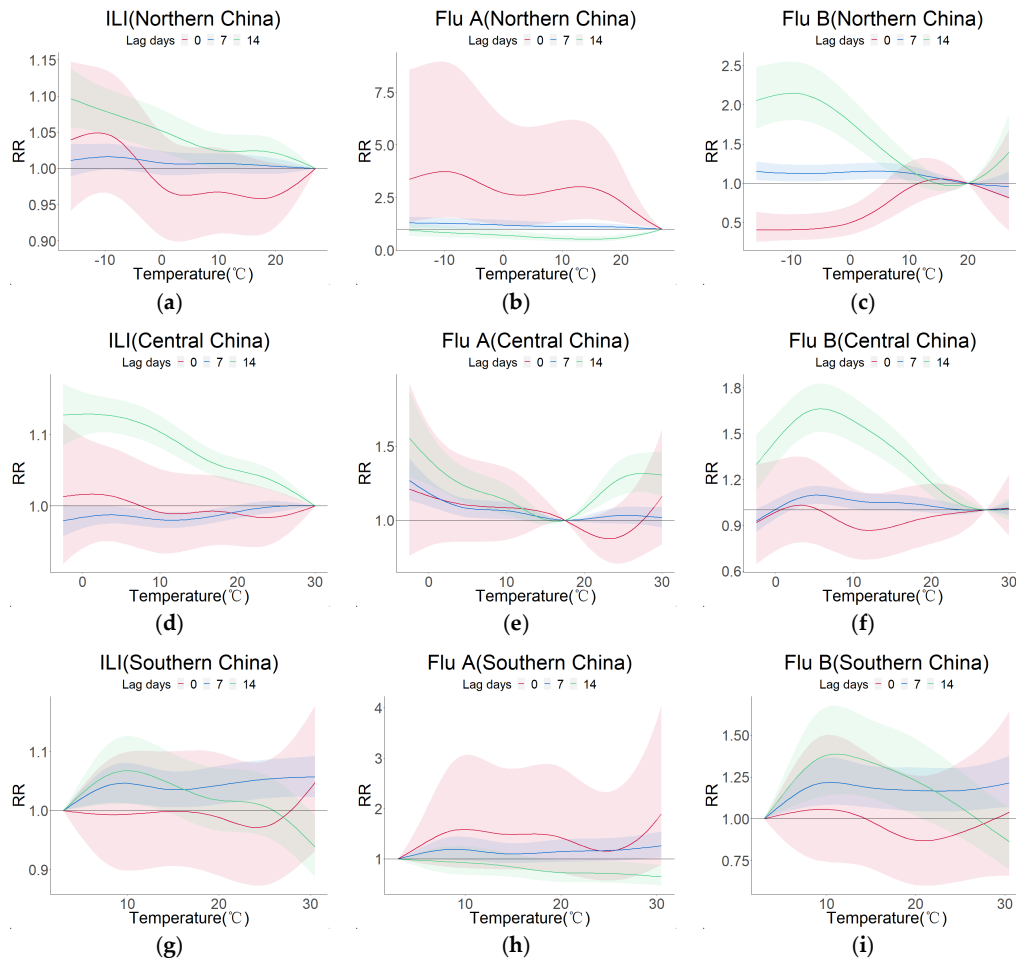

**Figure S5.** Relationship between the temperature of ILI, Flu A, and Flu B in different regions at specific lag times with RR. (a): ILI in northern China; (b): Flu A in northern China; (c): Flu B in northern China; (d): ILI in central China; (e): Flu A in central China; (f): Flu B in central China; (g): ILI in southern China; (h): Flu A in southern China; (i): Flu B in southern China. The shaded area represents the 95% confidence interval. Abbreviations: ILI, influenza-like illness; Flu A, influenza A; Flu B, influenza B; RR, relative risk.
